# Supplementary material for: Novel self-adaptive boat-shaped complexes with a tetraphosphine ligand
Source: Royal Society of Chemistry journal article supplement (doi:10.1039/c8dt02498g), 2018-01-01
Supplement: c8dt02498g1.pdf [file c8dt02498g1.pdf]

## Electronic Supporting Information

### **Novel self-adaptive boat-shaped complexes with a tetraphosphine ligand: synthesis, derivatization and investigations of encapsulating organic anions. DFT calculations on intramolecular CH $\cdots$ $\pi$ interactions**

Kai Yue,<sup>a</sup> Yi-He Guo,<sup>b</sup> Jia-Qing Pan,<sup>a</sup> Kai He,<sup>a</sup> Yuan-Yuan Qiao,<sup>b</sup> Feng-Bo Xu<sup>\*,a</sup> and Qing-Shan Li<sup>\*,a</sup>

<sup>a</sup>State Key Laboratory of Elemento-Organic Chemistry, Research Institute of Elemento-Organic Chemistry, Department of Chemistry, Nankai University, Tianjin 300071, People's Republic of China

<sup>b</sup>Applied Chemistry and Engineering Research Institute, College of Chemistry, Nankai University, Tianjin 300071, P. R. China.

1. HR-MS(ESI) of Compound c. (S2)
2. NMR spectra. (S3-S16)
3. Crystallographic structures. (S17-S18)
4. Selected bond distances and angles. (S19-S22)
5. Crystal Data and Structural Refinement for Complexes. (S23-S25)
6. The optimized ball-and-stick structure of complexes 6-8. (S26-S28)
7. Comparing diagram of crystal structure (orange) and calculation structure (green) for complex 7. (S29)
8. Calculation information table. (S30)

# 1. HR-MS(ESI) of Compound c

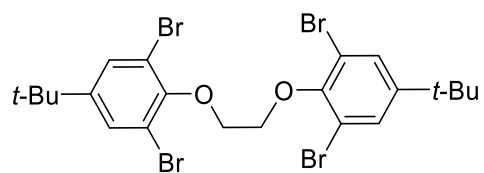

Varian QFT-ESI  
File: C22H26BR4O2(2)\_ESI.trans

Mode: Positive  
Scans: 1  
Date: 13-JUL-2018  
Time: 15:19:54  
Scale: 28.4129

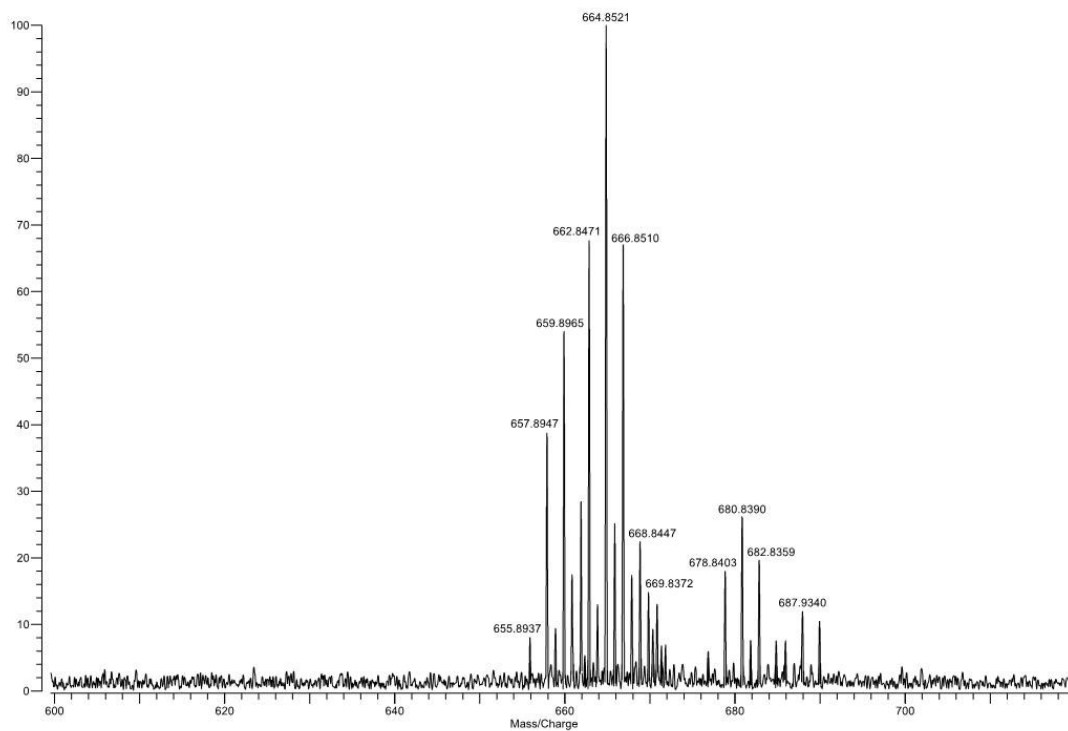

## 2. NMR spectra

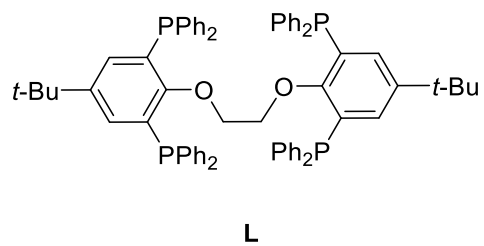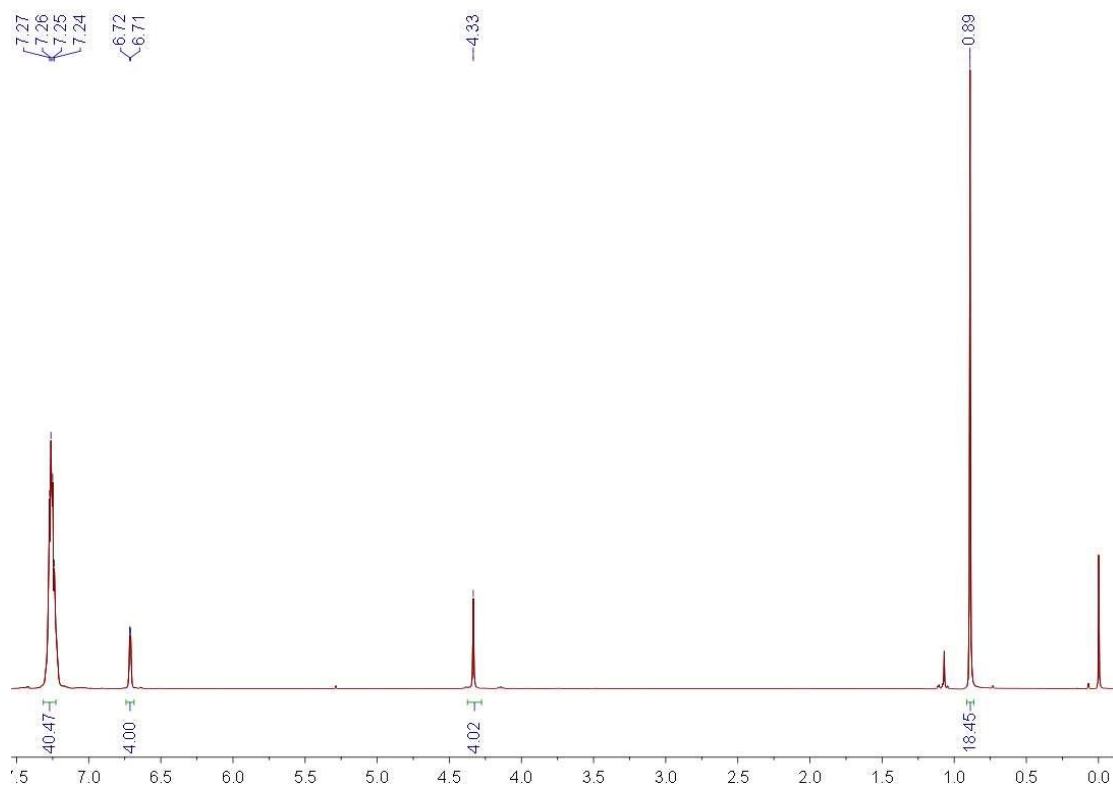

**Fig. S1.** 400 MHz <sup>1</sup>H NMR spectrum of Ligand L in CDCl<sub>3</sub> solution.

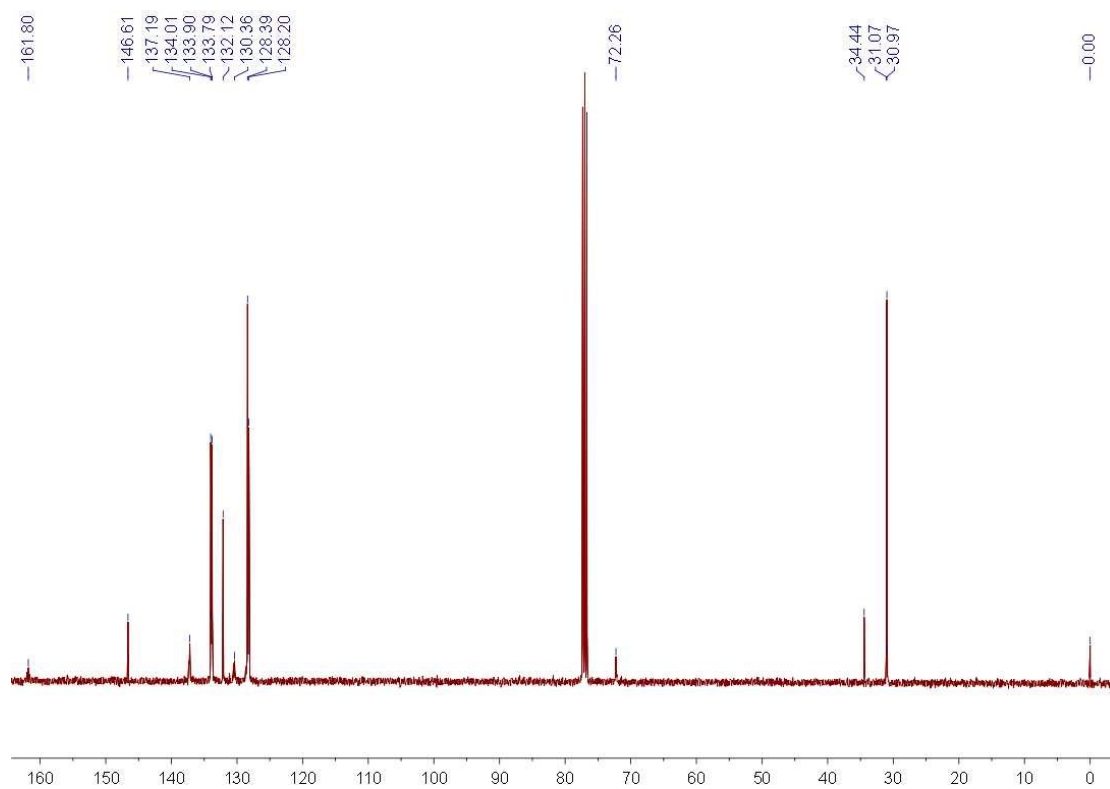

**Fig. S2.** 101 MHz  $^{13}\text{C}$  NMR spectrum of Ligand **L** in  $\text{CDCl}_3$  solution.

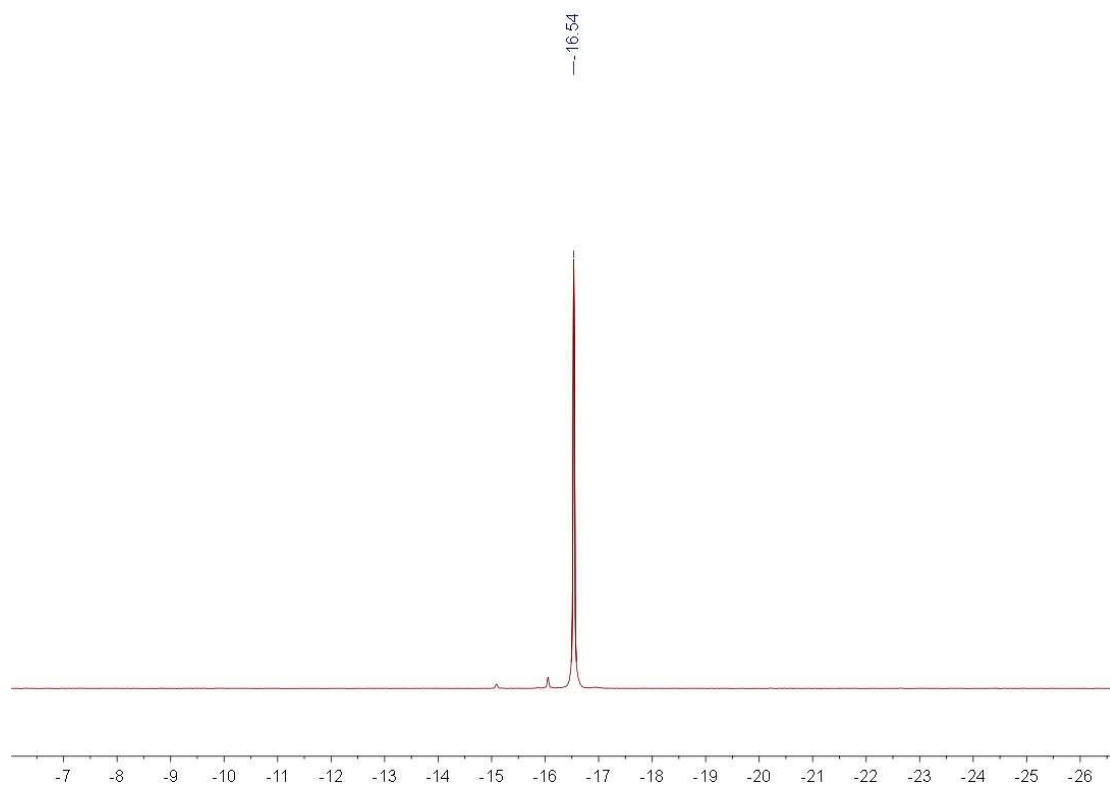

**Fig. S3.** 162 MHz  $^{31}\text{P}$  NMR spectrum of Ligand **L** in  $\text{CDCl}_3$  solution.

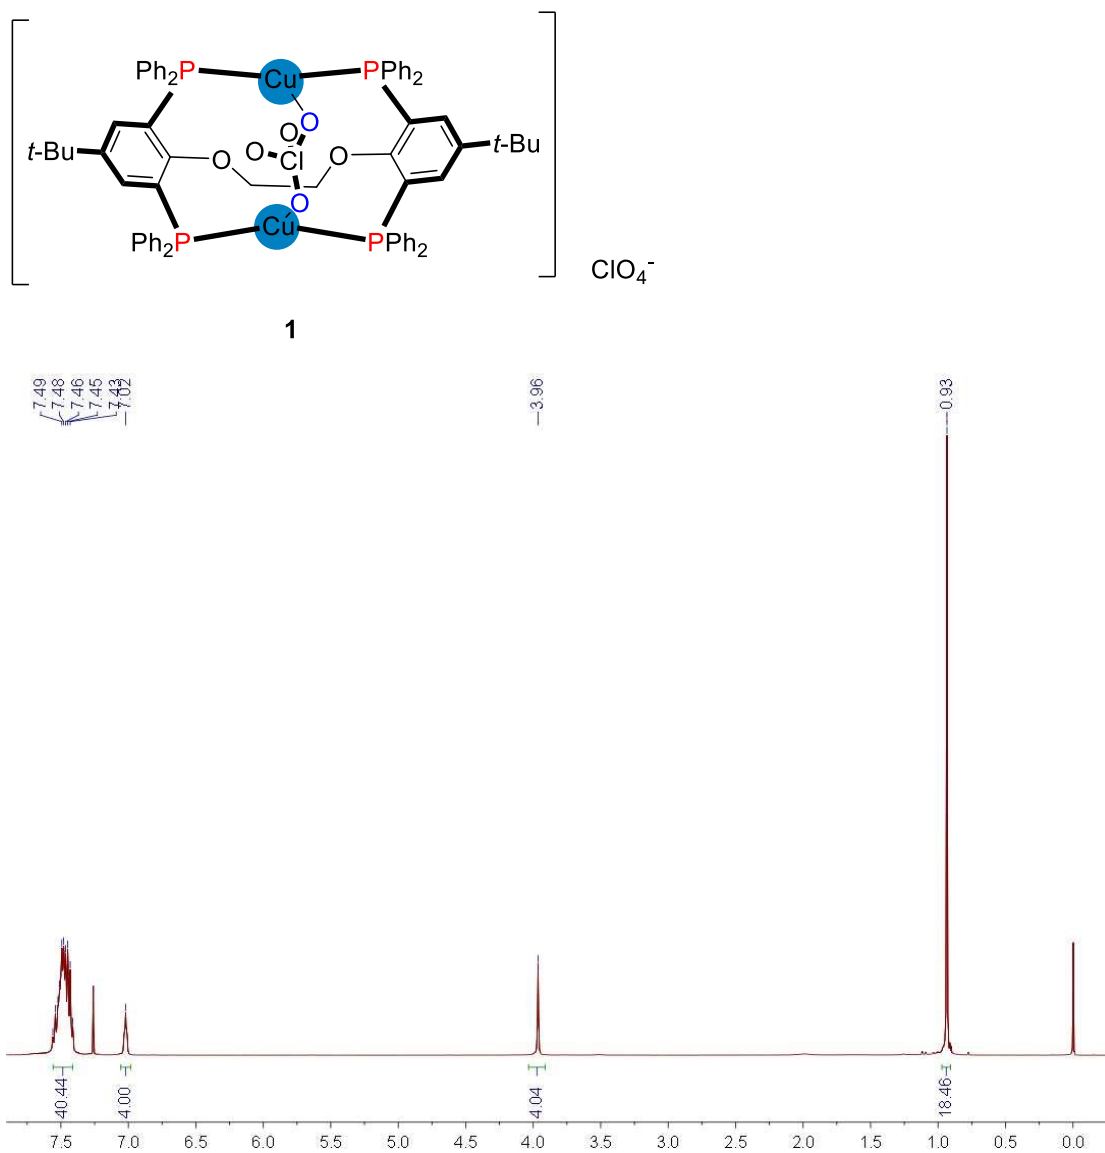

**Fig. S4.** 400 MHz  $^1\text{H}$  NMR spectrum of complex **1** in  $\text{CDCl}_3$  solution.

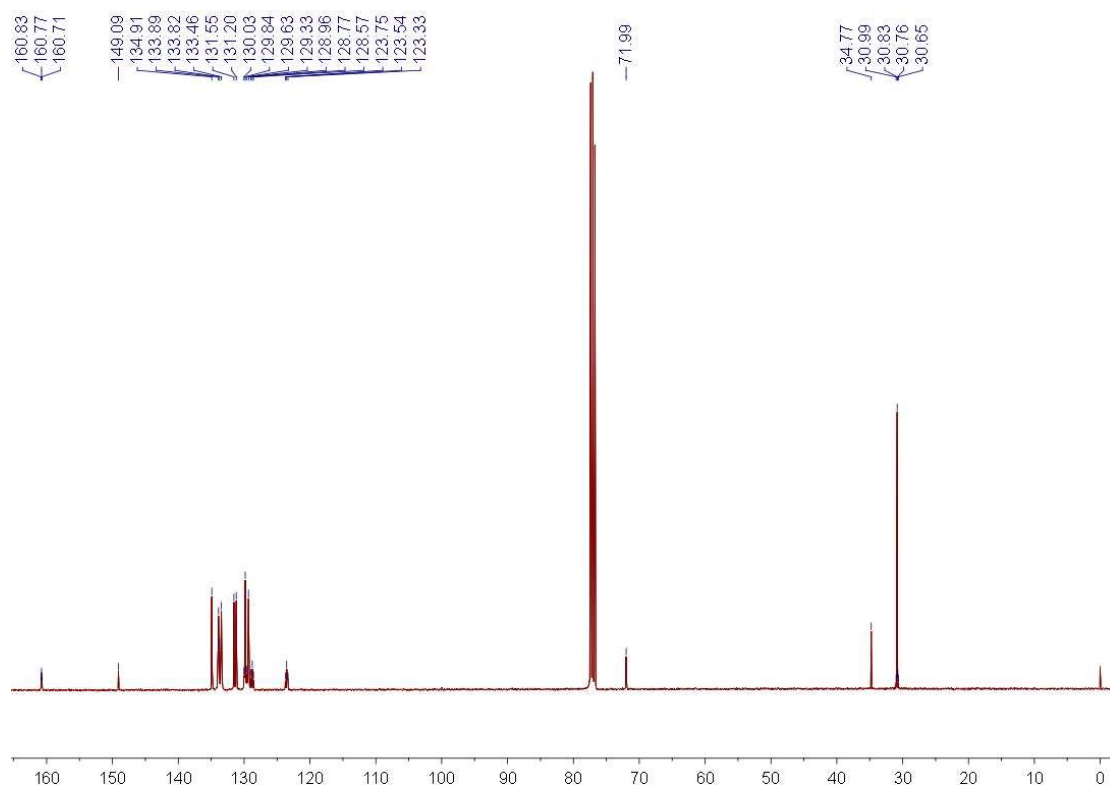

**Fig. S5.** 101 MHz  $^{13}\text{C}$  NMR spectrum of complex **1** in  $\text{CDCl}_3$  solution.

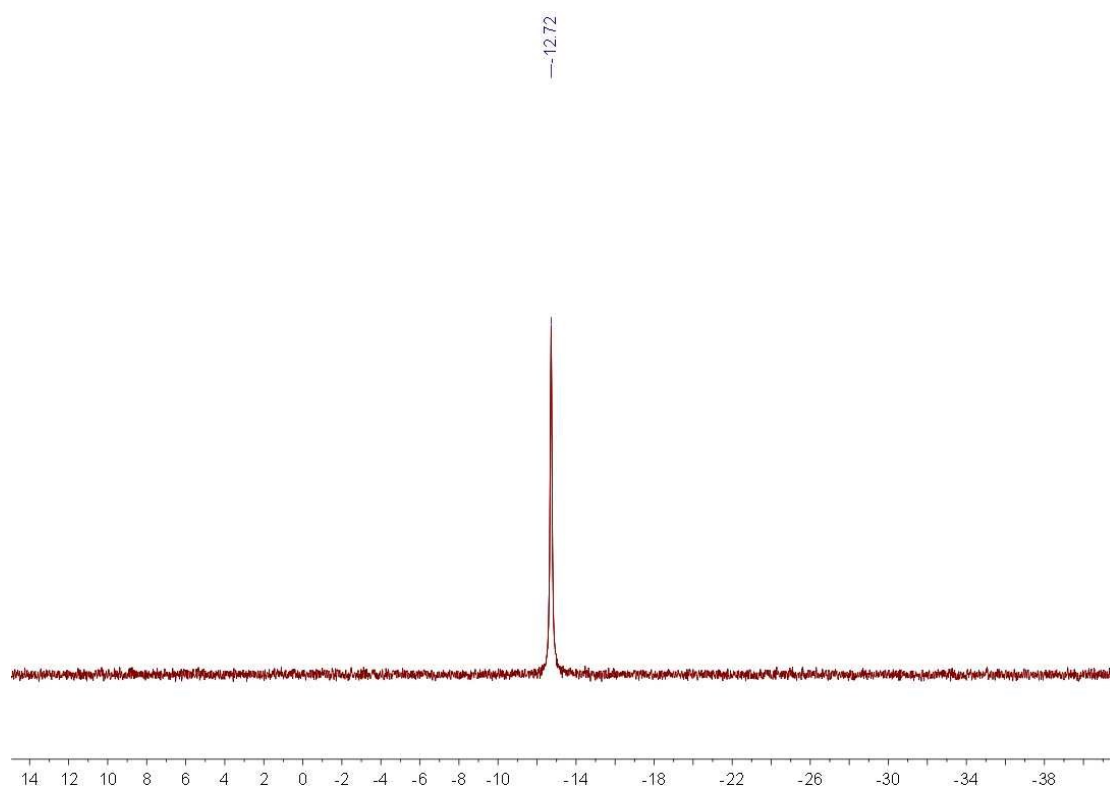

**Fig. S6.** 162 MHz  $^{31}\text{P}$  NMR spectrum of complex **1** in  $\text{CDCl}_3$  solution.

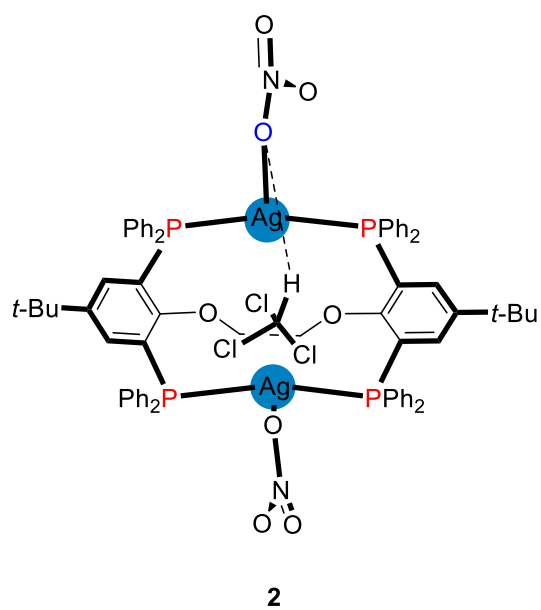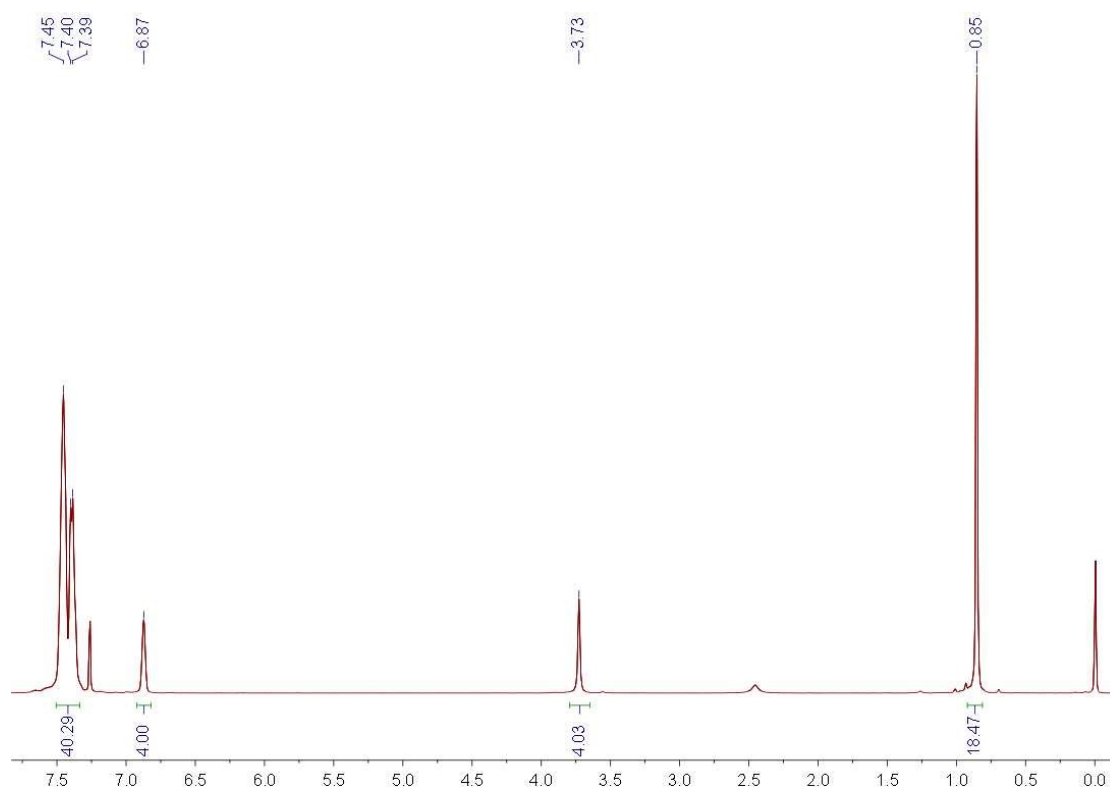

**Fig. S7.** 400 MHz  $^1\text{H}$  NMR spectrum of complex **2** in  $\text{CDCl}_3$  solution.

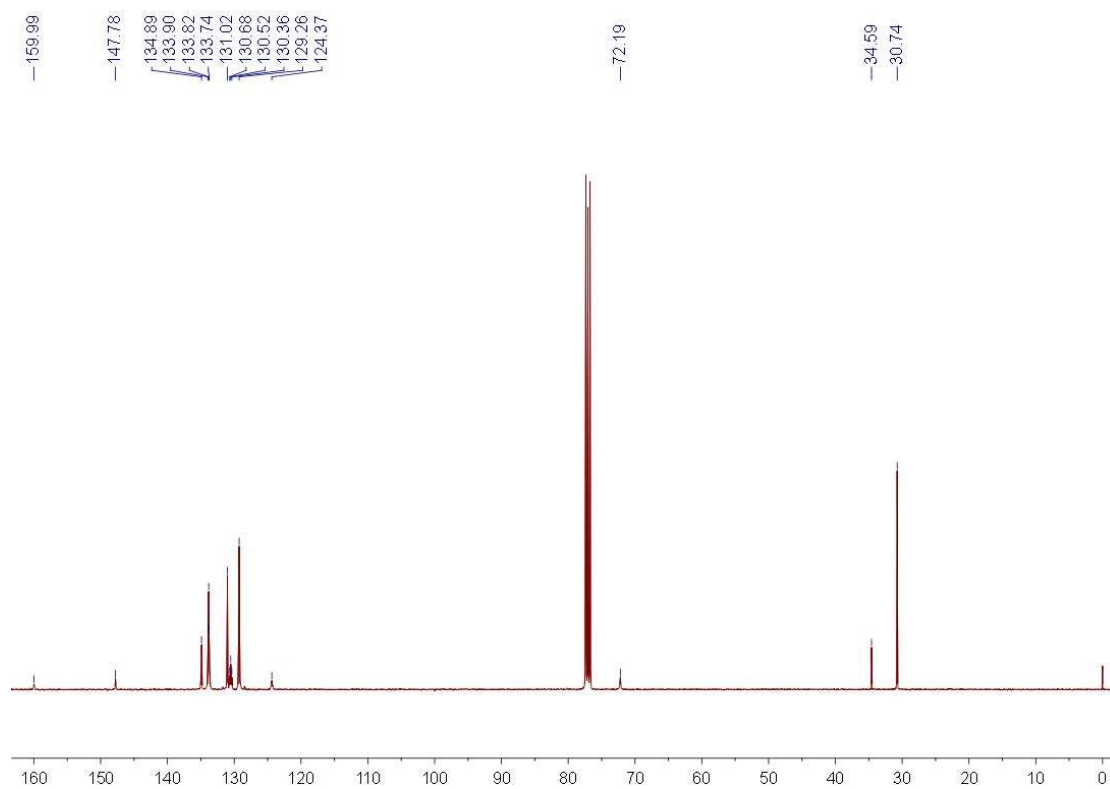

**Fig. S8.** 101 MHz  $^{13}\text{C}$  NMR spectrum of complex **2** in  $\text{CDCl}_3$  solution.

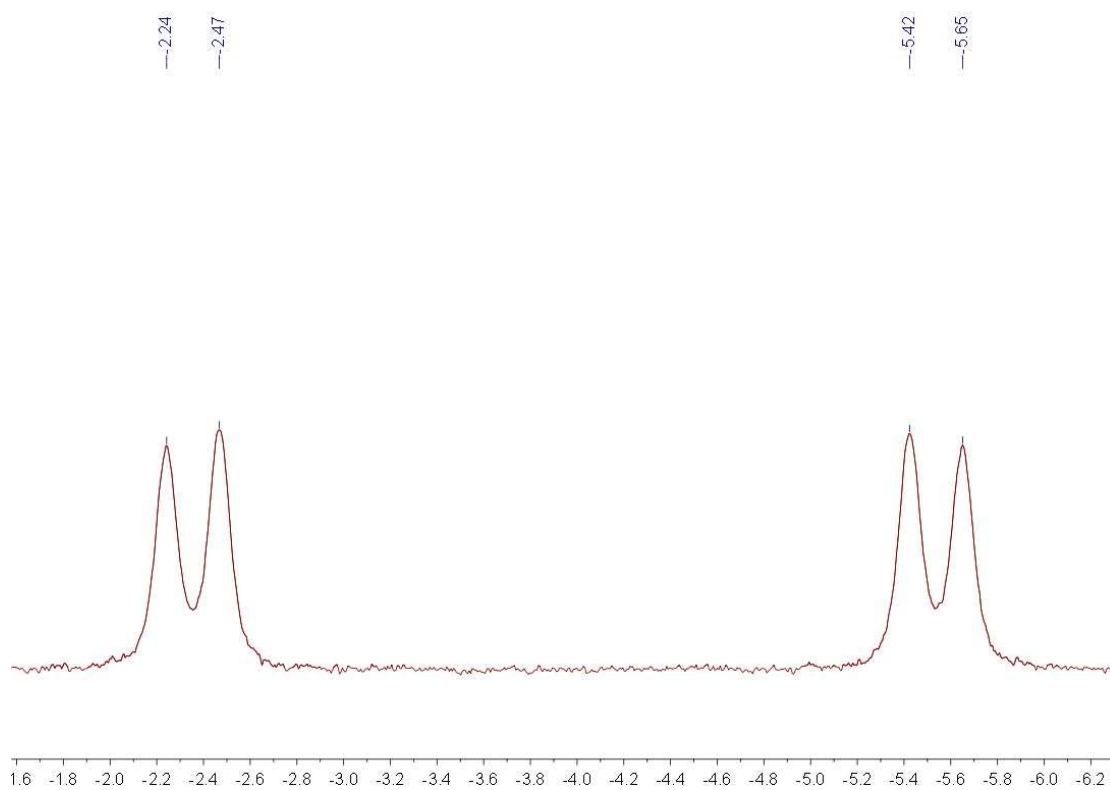

**Fig. S9.** 162 MHz  $^{31}\text{P}$  NMR spectrum of complex **2** in  $\text{CDCl}_3$  solution.



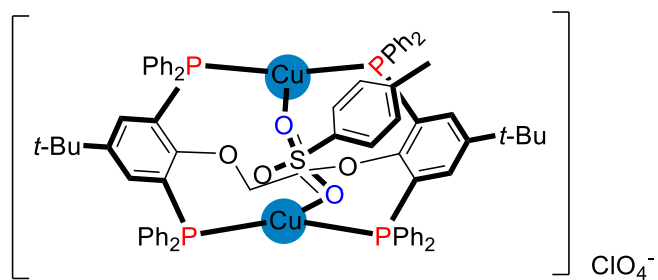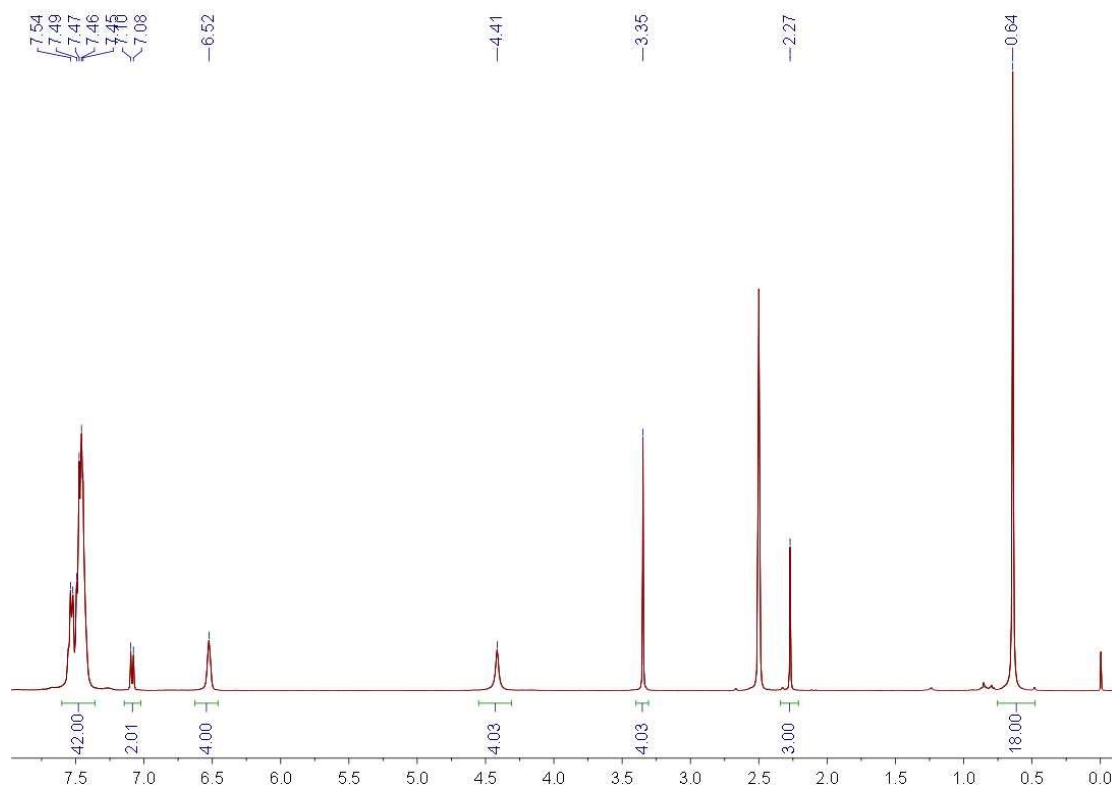

**Fig. S10.** 400 MHz  $^1\text{H}$  NMR spectrum of complex **3** in DMSO solution.

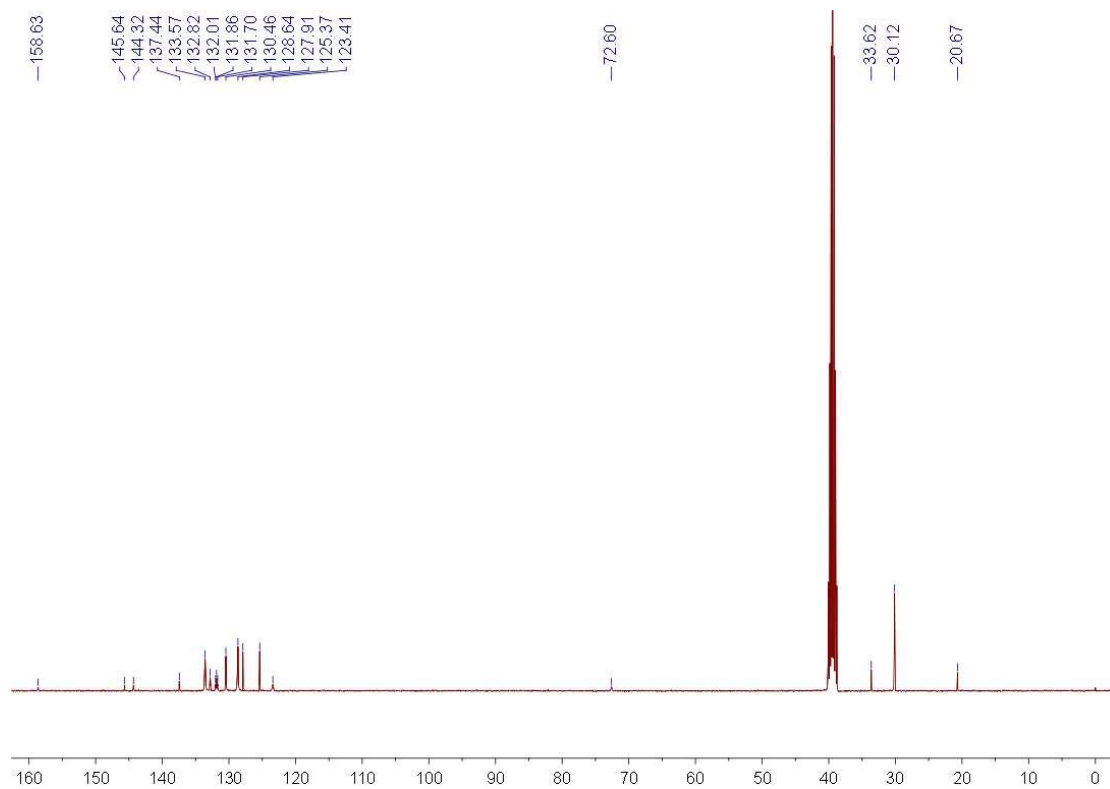

**Fig. S11.** 101 MHz  $^{13}\text{C}$  NMR spectrum of complex **3** in DMSO solution.

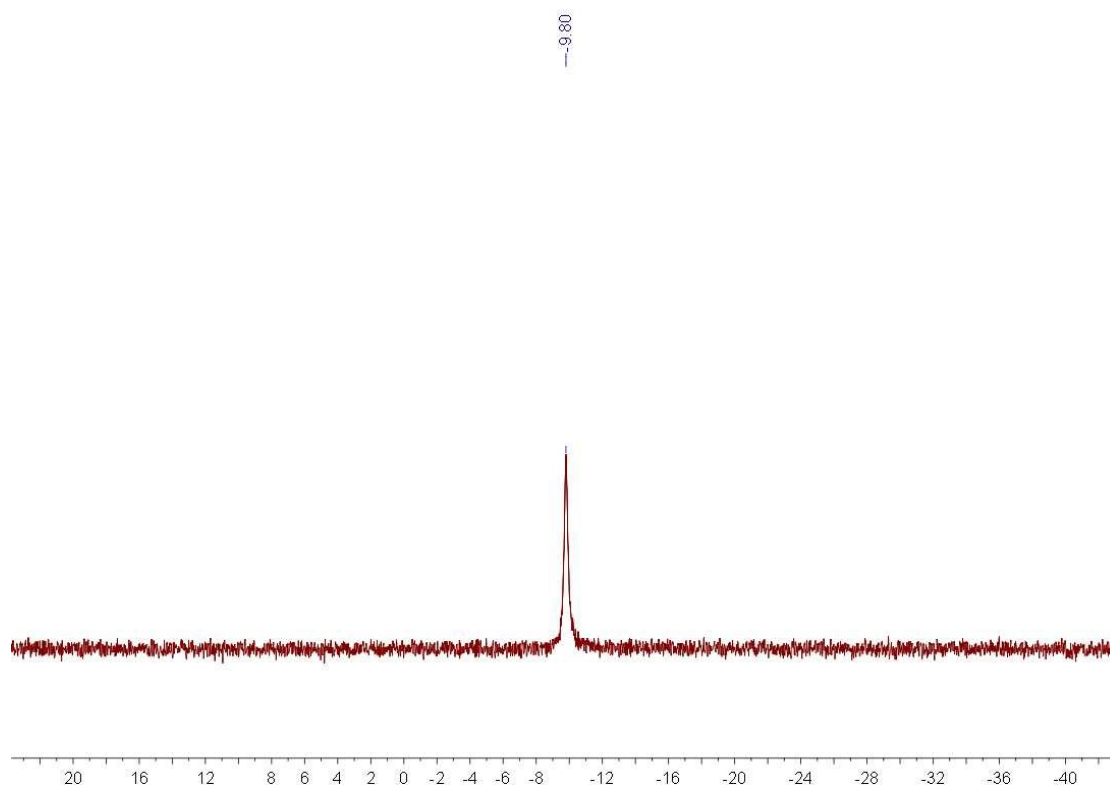

**Fig. S12.** 162 MHz  $^{31}\text{P}$  NMR spectrum of complex **3** in DMSO solution.

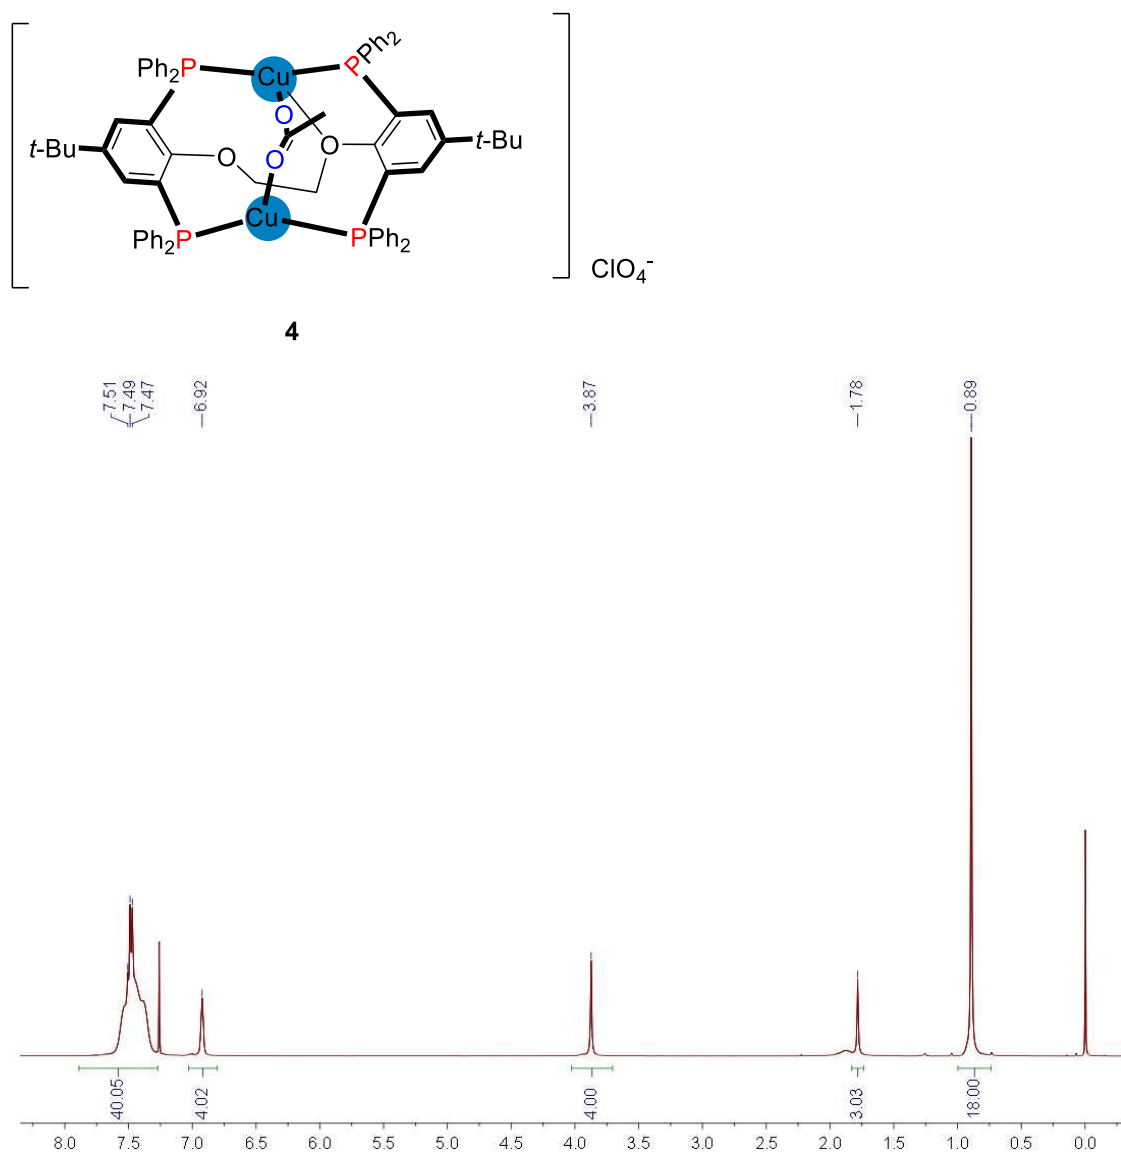

**Fig. S13.** 400 MHz <sup>1</sup>H NMR spectrum of complex **4** in CDCl<sub>3</sub> solution.

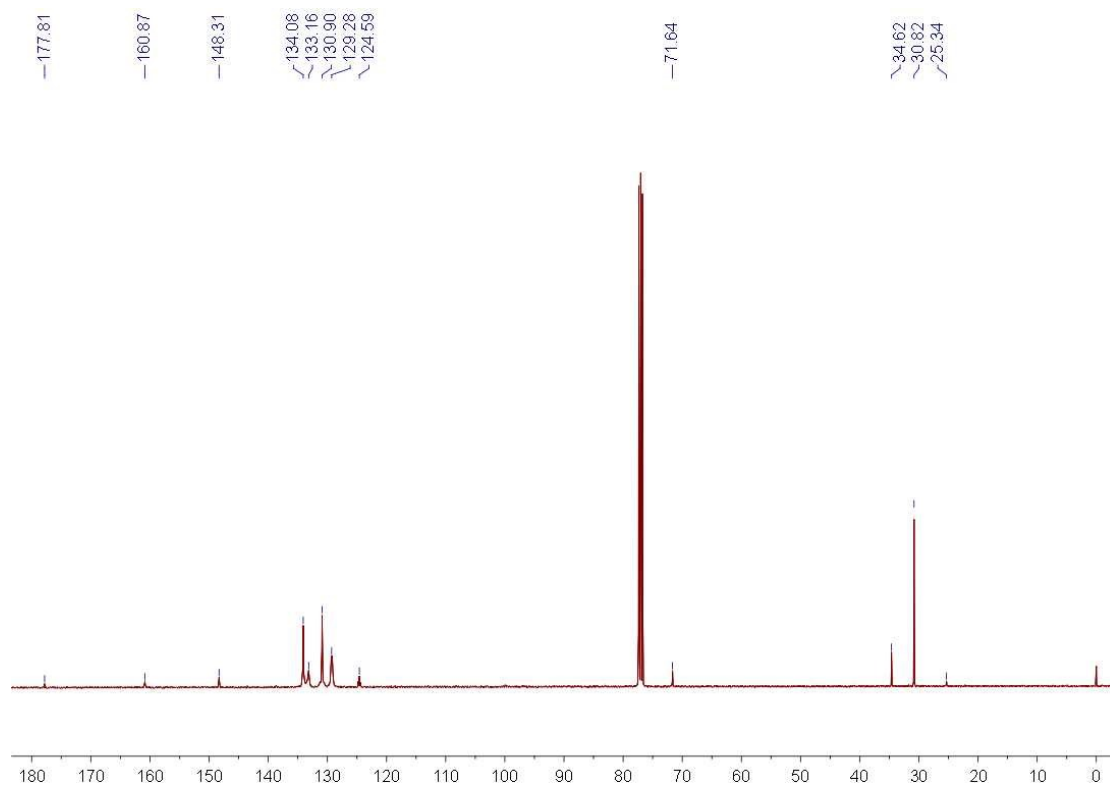

**Fig. S14.** 101 MHz  $^{13}\text{C}$  NMR spectrum of complex **4** in  $\text{CDCl}_3$  solution.

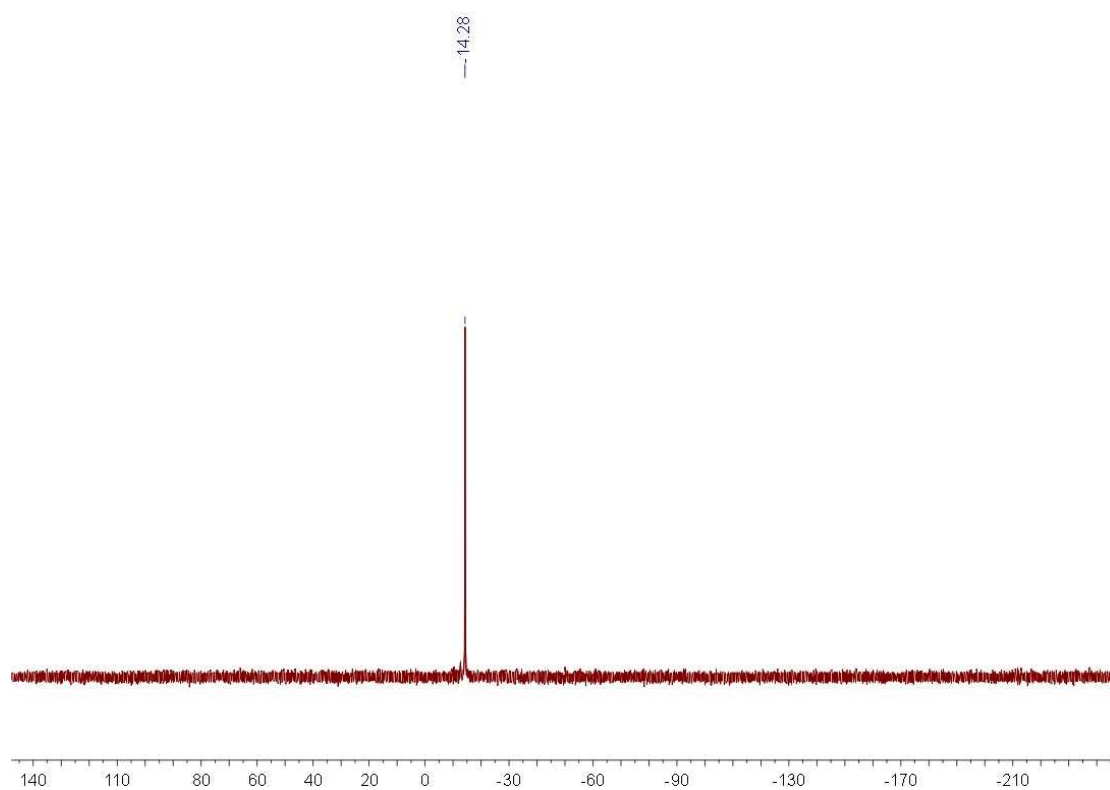

**Fig. S15.** 162 MHz  $^{31}\text{P}$  NMR spectrum of complex **4** in  $\text{CDCl}_3$  solution.

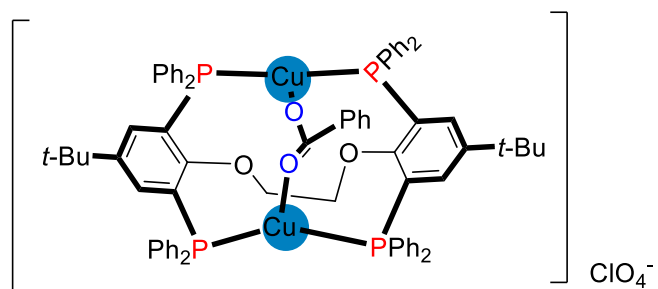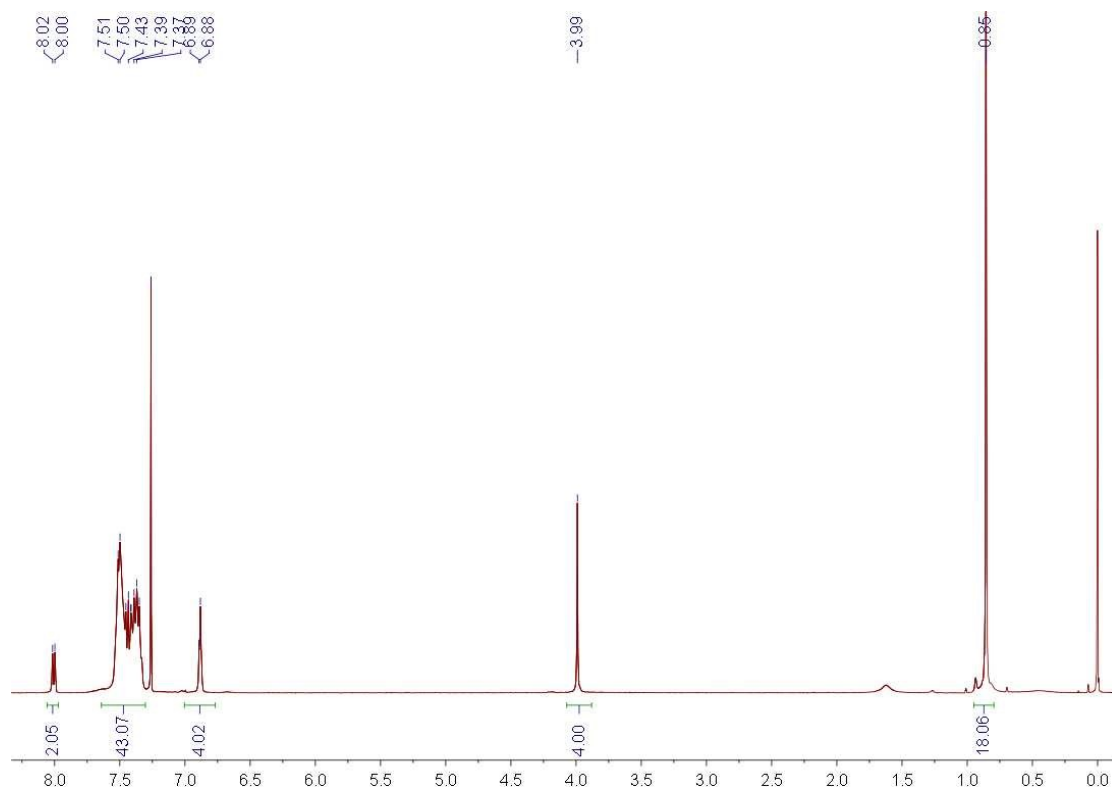

**Fig. S16.** 400 MHz  $^1\text{H}$  NMR spectrum of complex **5** in  $\text{CDCl}_3$  solution.

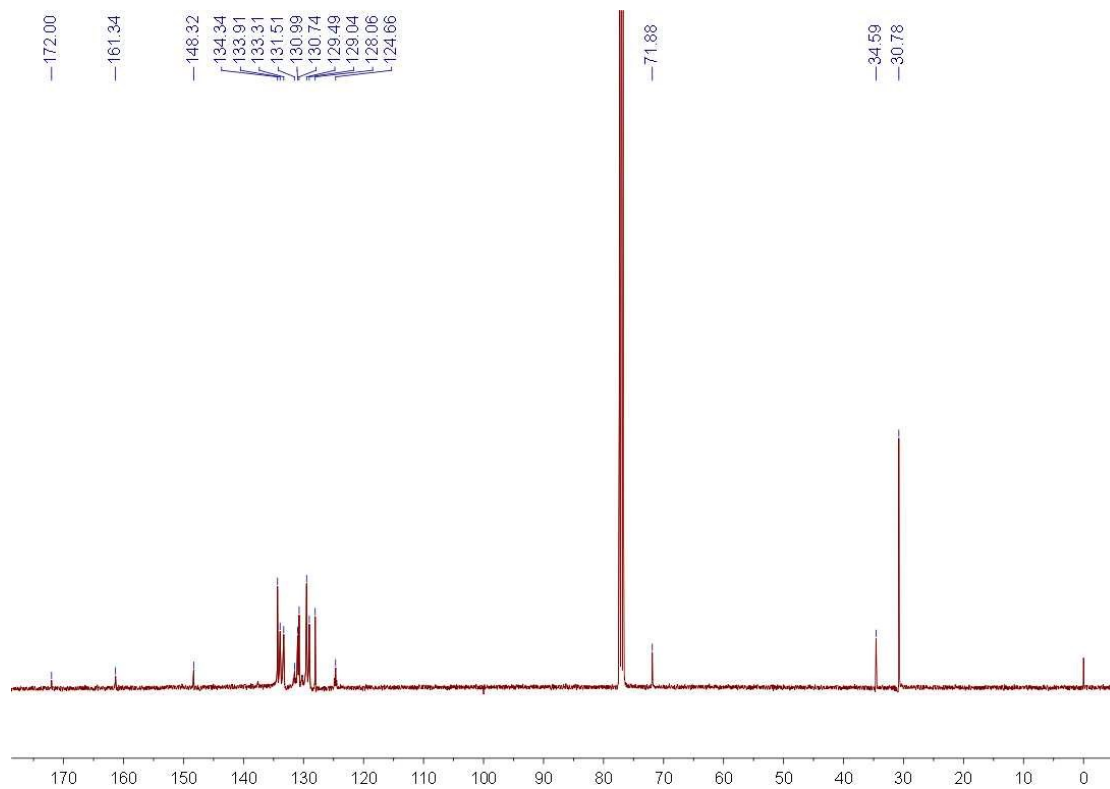

**Fig. S17.** 101 MHz  $^{13}\text{C}$  NMR spectrum of complex **5** in  $\text{CDCl}_3$  solution.

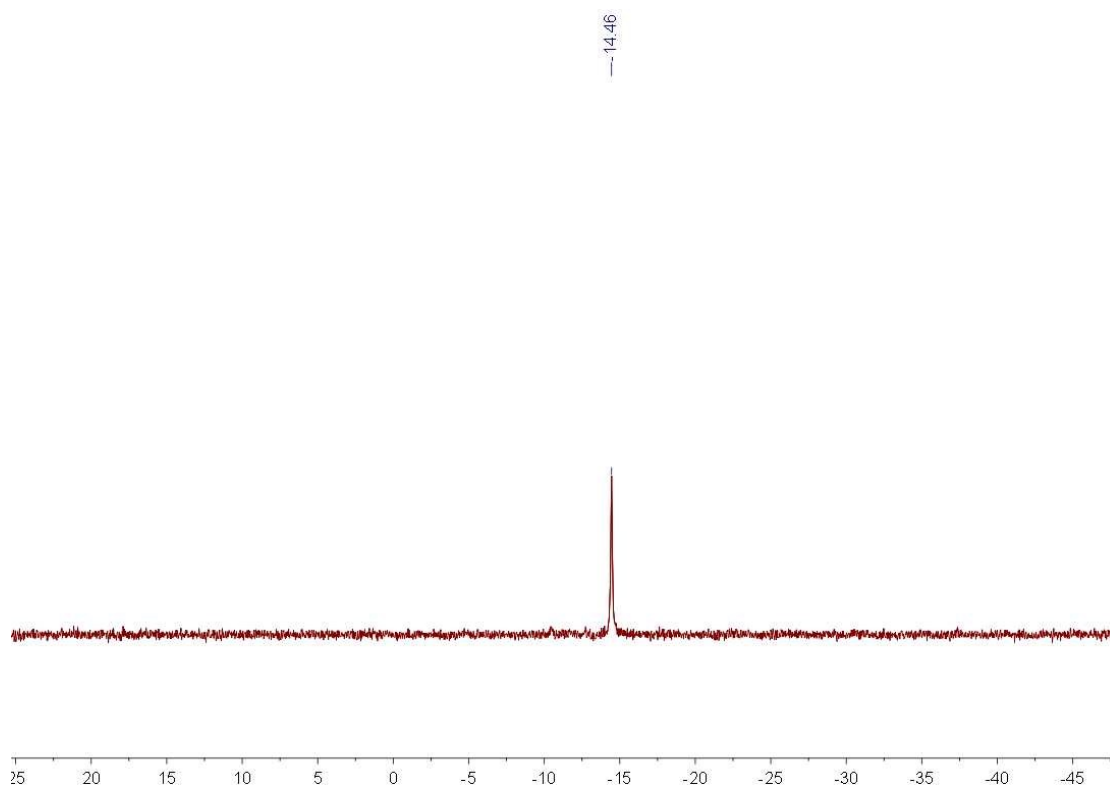

**Fig. S18.** 162 MHz  $^{31}\text{P}$  NMR spectrum of complex **5** in  $\text{CDCl}_3$  solution.

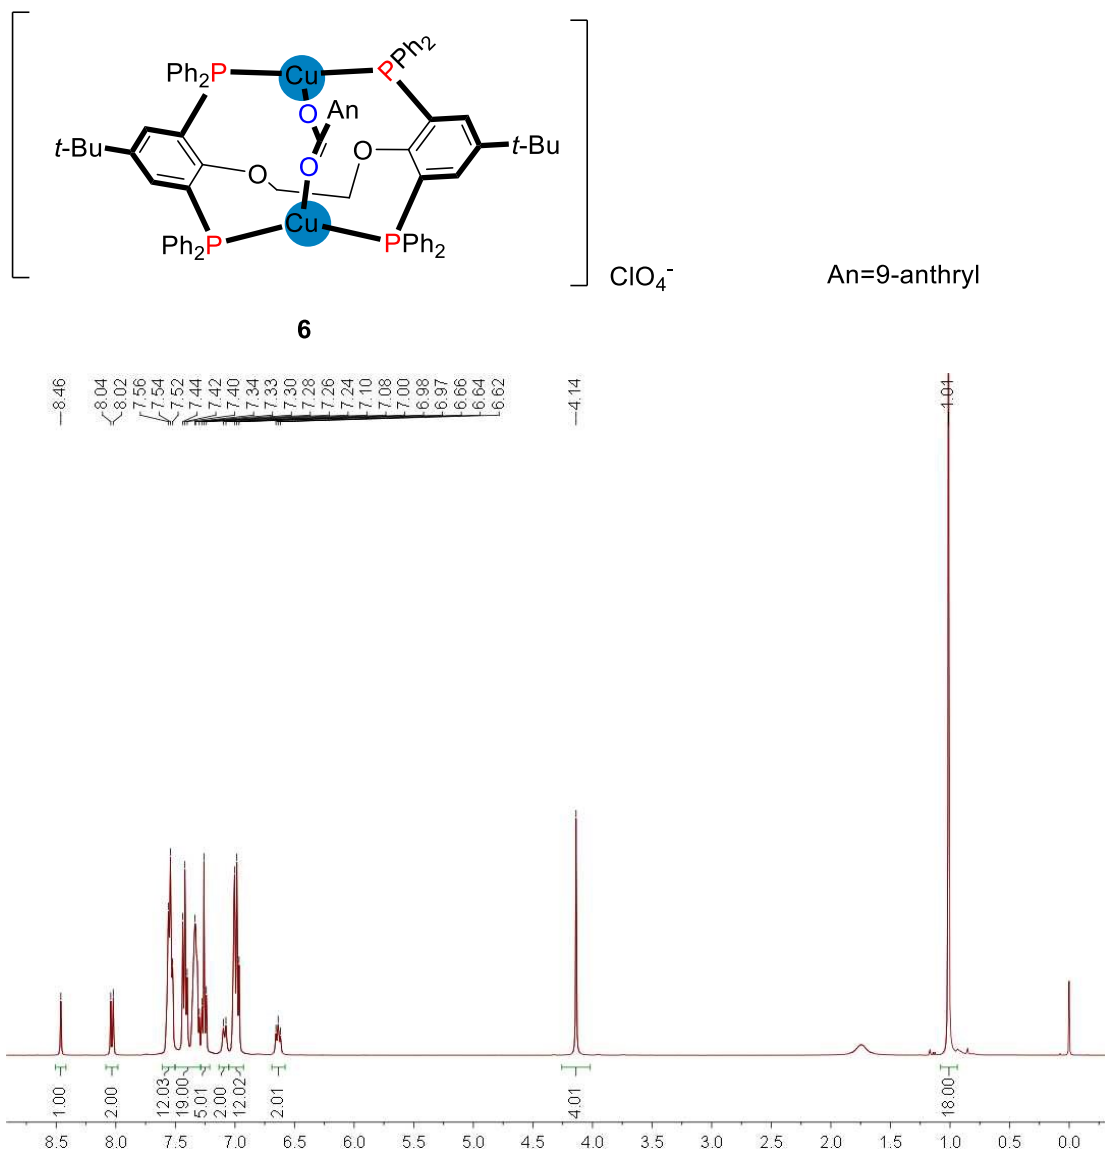

**Fig. S19.** 400 MHz  $^1\text{H}$  NMR spectrum of complex **6** in  $\text{CDCl}_3$  solution.

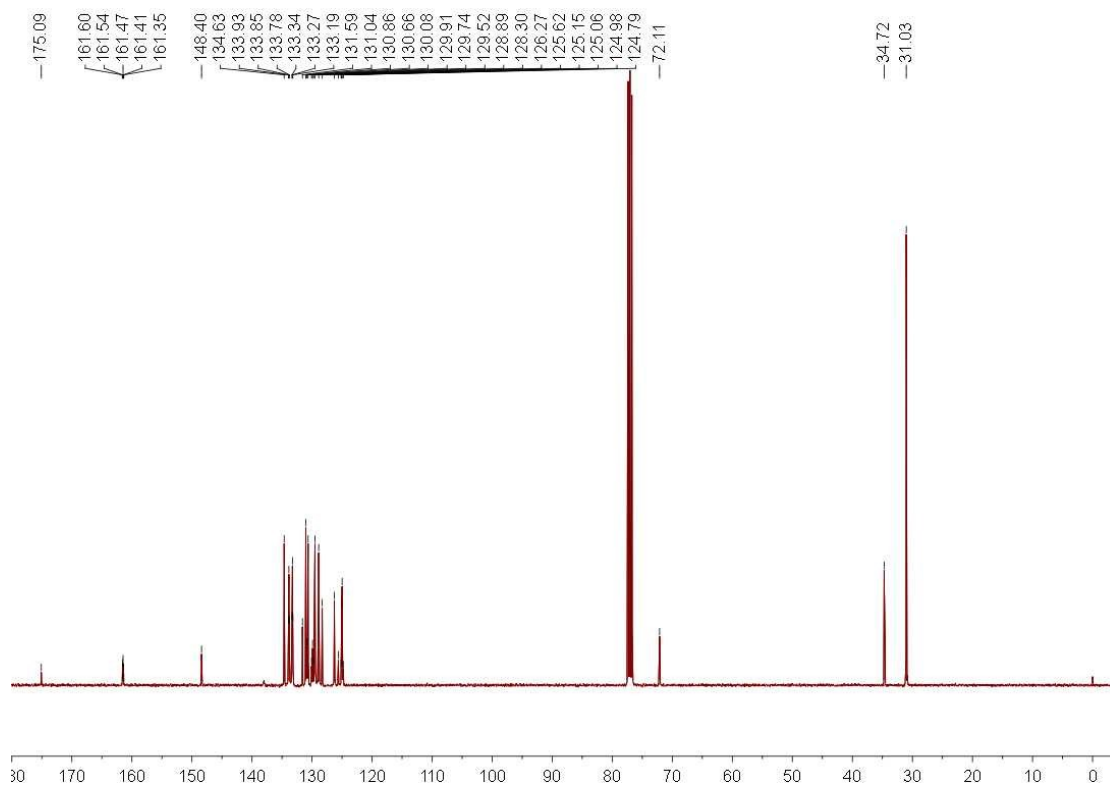

**Fig. S20.** 101 MHz  $^{13}\text{C}$  NMR spectrum of complex **6** in  $\text{CDCl}_3$  solution.

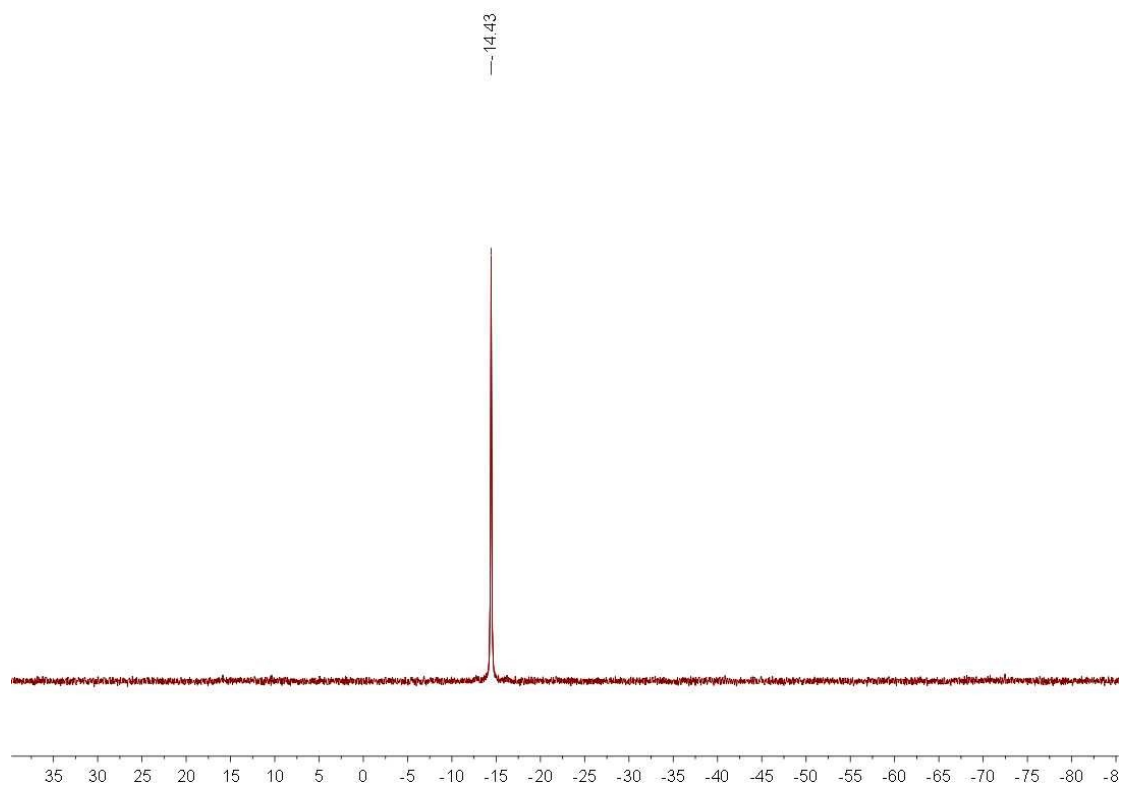

**Fig. S21.** 162 MHz  $^{31}\text{P}$  NMR spectrum of complex **6** in  $\text{CDCl}_3$  solution.



### 3. Crystallographic structures

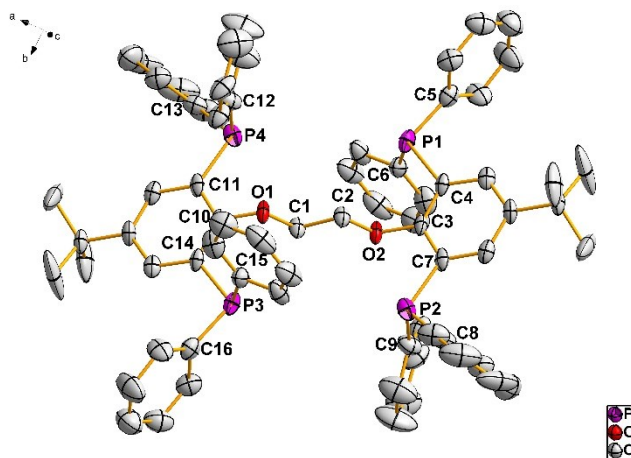

**Fig. S22.** Molecular views of the X-ray crystal structures of the ligand **L**. Thermal ellipsoids are shown at the 50% probability level. Hydrogen atoms and solvent molecules are omitted for clarity.

---

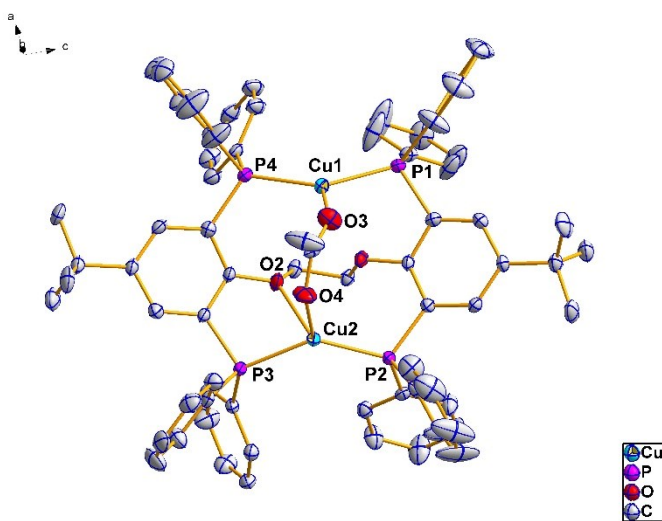

**Fig. S23.** Molecular views of the X-ray crystal structures of the Cu(I) complex **4**. Thermal ellipsoids are shown at the 50% probability level. Hydrogen atoms, one perchlorate anion and solvent molecules are omitted for clarity.

---

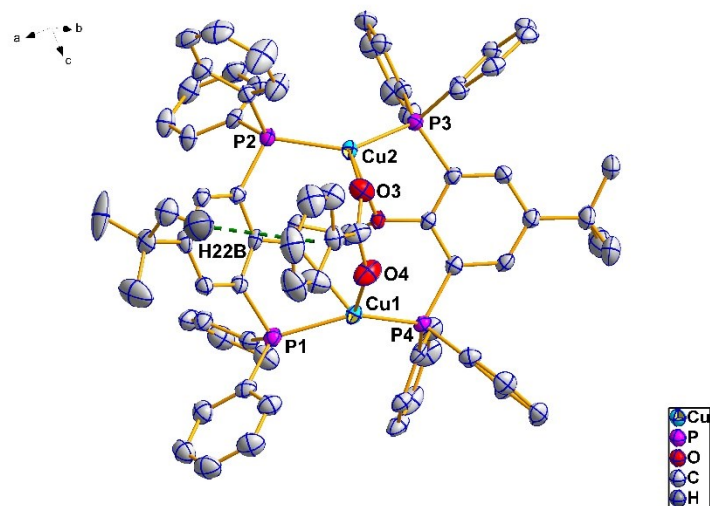

**Fig. S24.** Molecular views of the X-ray crystal structures of the Cu(I) complex **5**. Thermal ellipsoids are shown at the 50% probability level. Partial hydrogen atoms, one perchlorate anion and solvent molecules are omitted for clarity.

---

#### 4. Selected bond distances and angles

| Ligand L   |                    |                 |                 |
|------------|--------------------|-----------------|-----------------|
|            | Bond Distances (Å) |                 | Bond Angles (°) |
| O(2)-C(2)  | 1.442(6)           | C(2)-O(2)-C(3)  | 113.2(4)        |
| O(2)-C(3)  | 1.397(5)           | C(4)-P(1)-C(5)  | 101.6(2)        |
| P(1)-C(4)  | 1.838(5)           | C(4)-P(1)-C(6)  | 102.0(3)        |
| P(1)-C(5)  | 1.822(6)           | C(5)-P(1)-C(6)  | 104.3(3)        |
| P(1)-C(6)  | 1.827(6)           | C(7)-P(2)-C(8)  | 101.7(2)        |
| P(2)-C(7)  | 1.842(5)           | C(7)-P(2)-C(9)  | 102.3(3)        |
| P(2)-C(8)  | 1.825(6)           | C(8)-P(2)-C(9)  | 102.8(3)        |
| P(2)-C(9)  | 1.836(7)           |                 |                 |
| Complex 1  |                    |                 |                 |
|            | Bond Distances (Å) |                 | Bond Angles (°) |
| Cu(1)-O(3) | 2.228(3)           | O(3)-Cu(1)-P(1) | 121.73(9)       |
| Cu(1)-P(1) | 2.2715(13)         | O(3)-Cu(1)-P(4) | 96.05(9)        |
| Cu(1)-P(4) | 2.2787(13)         | P(1)-Cu(1)-P(4) | 141.89(5)       |
| Cu(2)-O(6) | 2.144(3)           | O(6)-Cu(2)-P(2) | 113.10(9)       |
| Cu(2)-P(2) | 2.2496(13)         | O(6)-Cu(2)-P(3) | 101.27(9)       |

|                  |                    |                 |                 |
|------------------|--------------------|-----------------|-----------------|
| Cu(2)-P(3)       | 2.2712(13)         | P(2)-Cu(2)-P(3) | 144.65(5)       |
| <b>Complex 2</b> |                    |                 |                 |
|                  | Bond Distances (Å) |                 | Bond Angles (°) |
| Ag(1)-O(3)       | 2.445(2)           | O(3)-Ag(1)-P(2) | 106.79(6)       |
| Ag(1)-P(2)       | 2.4627(9)          | O(3)-Ag(1)-P(1) | 105.94(5)       |
| Ag(1)-P(1)       | 2.4740(10)         | P(2)-Ag(1)-P(1) | 144.99(3)       |
| N(1)-O(5)        | 1.242(3)           | O(5)-N(1)-O(4)  | 119.8(3)        |
| N(1)-O(4)        | 1.261(3)           | O(5)-N(1)-O(3)  | 120.9(3)        |
| N(1)-O(3)        | 1.264(3)           | O(4)-N(1)-O(3)  | 119.2(2)        |
| <b>Complex 3</b> |                    |                 |                 |
|                  | Bond Distances (Å) |                 | Bond Angles (°) |
| Cu(1)-O(3)       | 2.086(5)           | O(3)-Cu(1)-P(1) | 122.99(15)      |
| Cu(1)-P(1)       | 2.2301(18)         | O(3)-Cu(1)-P(4) | 94.90(15)       |
| Cu(1)-P(4)       | 2.2881(18)         | P(1)-Cu(1)-P(4) | 141.86(7)       |
| Cu(2)-O(4)       | 2.094(4)           | O(4)-Cu(2)-P(3) | 115.08(15)      |
| Cu(2)-P(3)       | 2.2332(19)         | O(4)-Cu(2)-P(2) | 105.22(14)      |
| Cu(2)-P(2)       | 2.2719(18)         | P(3)-Cu(2)-P(2) | 139.04(7)       |
| <b>Complex 4</b> |                    |                 |                 |
|                  | Bond Distances (Å) |                 | Bond Angles (°) |
| Cu(1)-O(3)       | 2.015(2)           | O(3)-Cu(1)-P(4) | 114.55(9)       |
| Cu(1)-P(4)       | 2.2560(10)         | O(3)-Cu(1)-P(1) | 105.07(9)       |

|                  |                    |                 |                 |
|------------------|--------------------|-----------------|-----------------|
| Cu(1)-P(1)       | 2.3057(10)         | P(4)-Cu(1)-P(1) | 140.12(3)       |
| Cu(2)-O(4)       | 2.011(3)           | O(4)-Cu(2)-P(2) | 113.98(9)       |
| Cu(2)-P(2)       | 2.2153(9)          | O(4)-Cu(2)-P(3) | 106.46(8)       |
| Cu(2)-P(3)       | 2.2673(9)          | P(2)-Cu(2)-P(3) | 137.33(3)       |
| Cu(2)-O(2)       | 2.436(2)           | O(4)-Cu(2)-O(2) | 91.69(10)       |
|                  |                    | P(2)-Cu(2)-O(2) | 116.51(6)       |
|                  |                    | P(3)-Cu(2)-O(2) | 74.01(6)        |
| <b>Complex 5</b> |                    |                 |                 |
|                  | Bond Distances (Å) |                 | Bond Angles (°) |
| Cu(1)-O(4)       | 2.041(3)           | O(4)-Cu(1)-P(4) | 111.14(11)      |
| Cu(1)-P(4)       | 2.2538(8)          | O(4)-Cu(1)-P(1) | 108.18(11)      |
| Cu(1)-P(1)       | 2.2886(8)          | P(4)-Cu(1)-P(1) | 140.68(3)       |
| Cu(2)-O(3)       | 2.030(3)           | O(3)-Cu(2)-P(3) | 117.18(12)      |
| Cu(2)-P(3)       | 2.2366(8)          | O(3)-Cu(2)-P(2) | 102.29(11)      |
| Cu(2)-P(2)       | 2.2509(8)          | P(3)-Cu(2)-P(2) | 139.40(3)       |
| <b>Complex 6</b> |                    |                 |                 |
|                  | Bond Distances (Å) |                 | Bond Angles (°) |
| Cu(1)-O(3)       | 1.996(2)           | O(3)-Cu(1)-P(1) | 107.20(7)       |

|            |           |                 |           |
|------------|-----------|-----------------|-----------|
| Cu(1)-P(1) | 2.2349(9) | O(3)-Cu(1)-P(4) | 113.75(7) |
| Cu(1)-P(4) | 2.2380(9) | P(1)-Cu(1)-P(4) | 138.17(3) |
| Cu(2)-O(4) | 2.001(2)  | O(4)-Cu(2)-P(3) | 107.30(7) |
| Cu(2)-P(3) | 2.2339(9) | O(4)-Cu(2)-P(2) | 111.84(7) |
| Cu(2)-P(2) | 2.2458(9) | P(3)-Cu(2)-P(2) | 139.87(3) |

## 5. Crystal Data and Structural Refinement for Complexes.

**Table S1. Crystal Data and Structural Refinement for Complexes 1-2**

| Compound                                              | 1                                                                                              | 2                                                                                |
|-------------------------------------------------------|------------------------------------------------------------------------------------------------|----------------------------------------------------------------------------------|
| Empirical formula                                     | C <sub>70</sub> H <sub>66</sub> Cl <sub>2</sub> Cu <sub>2</sub> O <sub>10</sub> P <sub>4</sub> | C <sub>37</sub> H <sub>35</sub> AgCl <sub>6</sub> NO <sub>4</sub> P <sub>2</sub> |
| Formula weight                                        | 1389.08                                                                                        | 940.17                                                                           |
| Crystal system                                        | Monoclinic                                                                                     | Monoclinic                                                                       |
| Space group                                           | <i>P</i> 2 <sub>1</sub> / <i>c</i>                                                             | <i>P</i> 2 <sub>1</sub> / <i>m</i>                                               |
| <i>a</i> (Å)                                          | 13.292(3)                                                                                      | 11.219(2)                                                                        |
| <i>b</i> (Å)                                          | 28.940(6)                                                                                      | 25.594(5)                                                                        |
| <i>c</i> (Å)                                          | 17.711(4)                                                                                      | 14.172(3)                                                                        |
| $\alpha$ (°)                                          | 90                                                                                             | 90                                                                               |
| $\beta$ (°)                                           | 106.566(3)                                                                                     | 93.92(3)                                                                         |
| $\gamma$ (°)                                          | 90                                                                                             | 90                                                                               |
| <i>V</i> (Å <sup>3</sup> )                            | 6530(2)                                                                                        | 4060.1(14)                                                                       |
| <i>Z</i>                                              | 4                                                                                              | 4                                                                                |
| <i>D</i> <sub>calcd</sub> (Mg/m <sup>3</sup> )        | 1.413                                                                                          | 1.538                                                                            |
| Abs coeff (mm <sup>-1</sup> )                         | 0.890                                                                                          | 1.009                                                                            |
| <i>F</i> (000)                                        | 2872                                                                                           | 1900                                                                             |
| Crystal size                                          | 0.180 x 0.160 x 0.140 mm                                                                       | 0.180 x 0.160 x 0.140 mm                                                         |
| Range of $\theta$ for data collection                 | 1.391 to 25.018°                                                                               | 1.591 to 25.020°                                                                 |
| Reflections collected/unique                          | 49080 / 11528<br>[R(int) = 0.0785]                                                             | 29906 / 7269<br>[R(int) = 0.0411]                                                |
| Max. & min. transmission                              | 0.8855 and 0.8562                                                                              | 1.0000 and 0.6742                                                                |
| Final R indices [ <i>I</i> > 2 $\sigma$ ( <i>I</i> )] | R1 = 0.0667, wR2 = 0.1517                                                                      | R1 = 0.0373, wR2 = 0.0906                                                        |

|                                   |                              |                              |
|-----------------------------------|------------------------------|------------------------------|
| R indices (all data)              | R1 = 0.0813, wR2 =<br>0.1605 | R1 = 0.0421, wR2 =<br>0.0939 |
| Data/restraints/parameters        | 11528 / 170 / 861            | 7269 / 354 / 495             |
| Goodness-of-fit on F <sup>2</sup> | 1.102                        | 1.032                        |

**Table S2. Crystal Data and Structural Refinement for Complexes 3-6**

| Compound                                       | 3                                                                                                | 4                                                                                             | 5                                                                                             | 6                                                                                             |
|------------------------------------------------|--------------------------------------------------------------------------------------------------|-----------------------------------------------------------------------------------------------|-----------------------------------------------------------------------------------------------|-----------------------------------------------------------------------------------------------|
| Empirical formula                              | C <sub>80</sub> H <sub>76</sub> Cl <sub>10</sub> Cu <sub>2</sub> O <sub>9</sub> P <sub>4</sub> S | C <sub>74</sub> H <sub>72</sub> Cl <sub>6</sub> Cu <sub>2</sub> O <sub>8</sub> P <sub>4</sub> | C <sub>79</sub> H <sub>73</sub> Cl <sub>7</sub> Cu <sub>2</sub> O <sub>8</sub> P <sub>4</sub> | C <sub>87</sub> H <sub>77</sub> Cl <sub>7</sub> Cu <sub>2</sub> O <sub>8</sub> P <sub>4</sub> |
| Formula weight                                 | 1818.92                                                                                          | 1552.97                                                                                       | 1649.48                                                                                       | 1749.59                                                                                       |
| Crystal system                                 | Orthorhombic                                                                                     | Monoclinic                                                                                    | Monoclinic                                                                                    | Monoclinic                                                                                    |
| Space group                                    | <i>Pna</i> 2 <sub>1</sub>                                                                        | <i>P</i> 2 <sub>1</sub> /n                                                                    | <i>P</i> 2 <sub>1</sub> /n                                                                    | <i>P</i> 2 <sub>1</sub> /n                                                                    |
| <i>a</i> (Å)                                   | 20.061(4)                                                                                        | 13.204(3)                                                                                     | 17.962(3)                                                                                     | 17.720(4)                                                                                     |
| <i>b</i> (Å)                                   | 23.316(5)                                                                                        | 20.254(4)                                                                                     | 20.584(3)                                                                                     | 20.286(4)                                                                                     |
| <i>c</i> (Å)                                   | 17.798(4)                                                                                        | 27.031(5)                                                                                     | 21.081(3)                                                                                     | 23.057(5)                                                                                     |
| $\alpha$ (°)                                   | 90                                                                                               | 90                                                                                            | 90                                                                                            | 90                                                                                            |
| $\beta$ (°)                                    | 90                                                                                               | 94.95(3)                                                                                      | 100.796(3)                                                                                    | 90.04(3)                                                                                      |
| $\gamma$ (°)                                   | 90                                                                                               | 90                                                                                            | 90                                                                                            | 90                                                                                            |
| <i>V</i> (Å <sup>3</sup> )                     | 8325(3)                                                                                          | 7202(3)                                                                                       | 7656.4(19)                                                                                    | 8288(3)                                                                                       |
| <i>Z</i>                                       | 4                                                                                                | 4                                                                                             | 4                                                                                             | 4                                                                                             |
| <i>D</i> <sub>calcd</sub> (Mg/m <sup>3</sup> ) | 1.451                                                                                            | 1.432                                                                                         | 1.431                                                                                         | 1.402                                                                                         |
| Abs coeff (mm <sup>-1</sup> )                  | 0.988                                                                                            | 0.957                                                                                         | 0.938                                                                                         | 0.871                                                                                         |
| <i>F</i> (000)                                 | 3728                                                                                             | 3200                                                                                          | 3392                                                                                          | 3600                                                                                          |
| Crystal size                                   | 0.180 x 0.160 x 0.140 mm                                                                         | 0.180 x 0.160 x 0.140 mm                                                                      | 0.180 x 0.160 x 0.140 mm                                                                      | 0.2000 x 0.1800 x 0.1600 mm                                                                   |
| Range of $\theta$ for data collection          | 1.339 to 25.020°                                                                                 | 1.816 to 27.869°                                                                              | 1.369 to 25.009°                                                                              | 1.337 to 25.020°                                                                              |
| Reflections collected/<br>unique               | 60785 / 14685<br>[R(int) = 0.0520]                                                               | 78478 / 17101<br>[R(int) = 0.0497]                                                            | 79083 / 13500<br>[R(int) = 0.0417]                                                            | 68212 / 14638<br>[R(int) = 0.0585]                                                            |



|                                      |                              |                              |                              |                           |
|--------------------------------------|------------------------------|------------------------------|------------------------------|---------------------------|
| Max. & min. transmission             | 0.8740 and 0.8421            | 0.8777 and 0.8467            | 0.8799 and 0.8493            | 1.0000 and 0.8314         |
| Final R indices [ $I > 2\sigma(I)$ ] | R1 = 0.0481, wR2 =<br>0.1104 | R1 = 0.0598, wR2 =<br>0.1497 | R1 = 0.0462, wR2 =<br>0.1100 | R1 = 0.0451, wR2 = 0.1059 |
| R indices (all data)                 | R1 = 0.0504, wR2 =<br>0.1116 | R1 = 0.0715, wR2 =<br>0.1598 | R1 = 0.0489, wR2 =<br>0.1119 | R1 = 0.0594, wR2 = 0.1141 |
| Data/restraints/parameters           | 14685 / 109 / 988            | 17101 / 319 / 937            | 13500 / 478 / 951            | 14638 / 0 / 943           |
| Goodness-of-fit on $F^2$             | 1.123                        | 0.951                        | 1.081                        | 1.022                     |

---

## 6. The optimized ball-and-stick structure of complexes 4-6

---

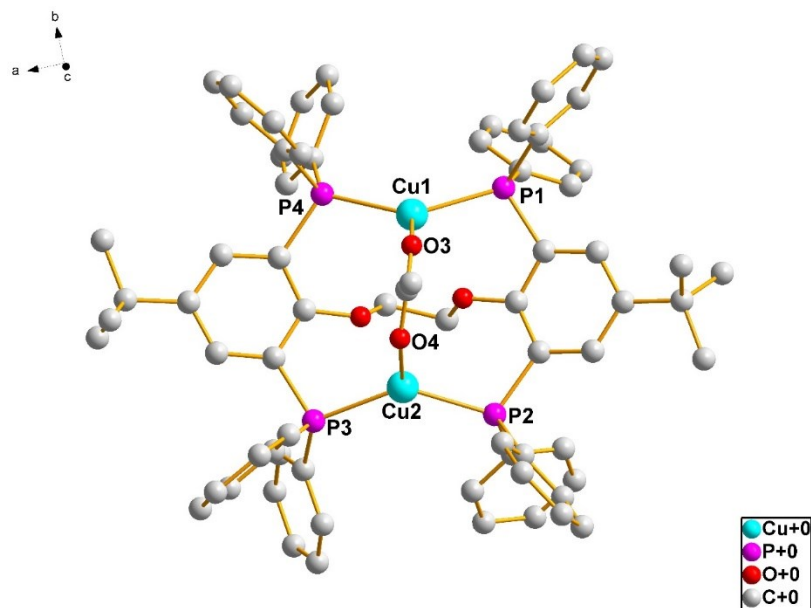

**Fig. S25a.** The optimized ball-and-stick structure without D3 of the Cu(I) complex 4.

Hydrogen atoms, one perchlorate anion and solvent molecules are omitted.

---

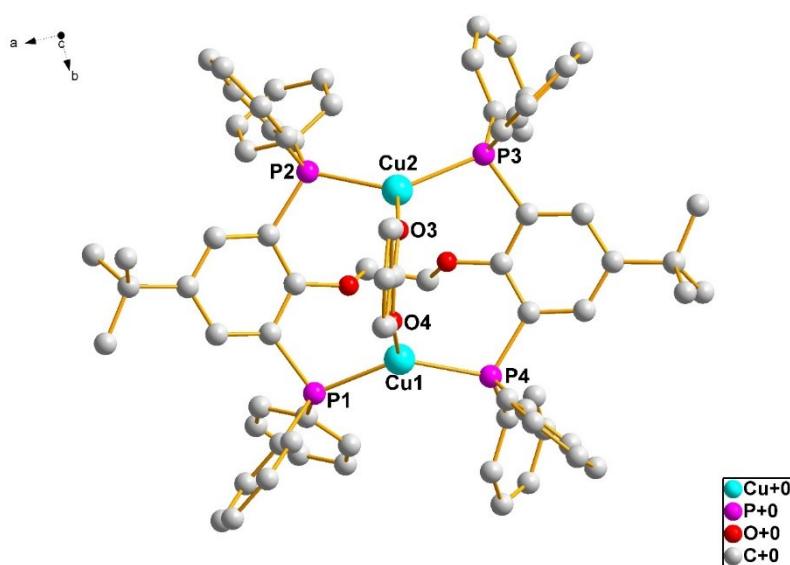

**Fig. S25b.** The optimized ball-and-stick structure without D3 of the Cu(I) complex 5.

Hydrogen atoms, one perchlorate anion and solvent molecules are omitted.

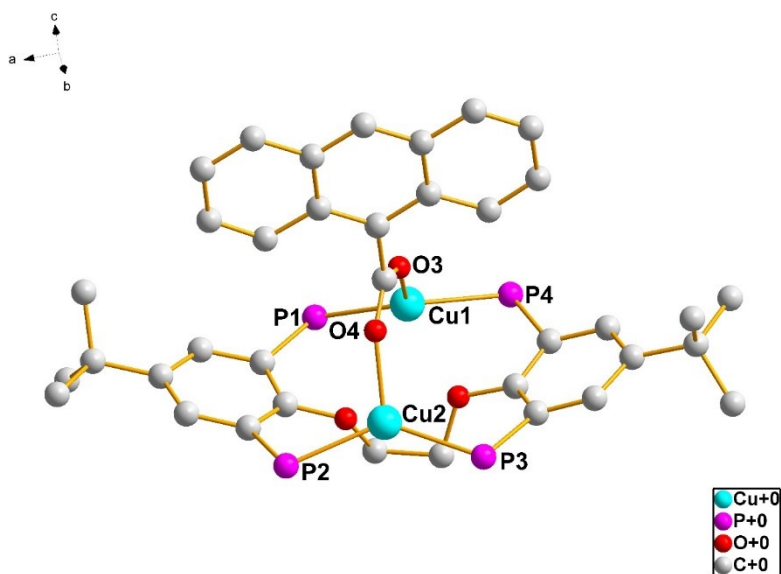

**Fig. S25c.** The optimized ball-and-stick structure without D3 of the Cu(I) complex **6**.

Hydrogen atoms, one perchlorate anion, solvent molecules and phenyl are omitted.

---

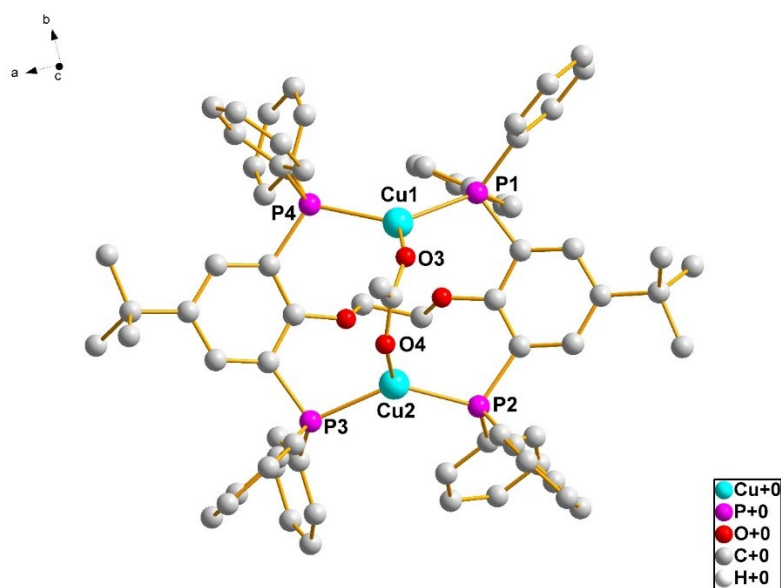

**Fig. S26a.** The optimized ball-and-stick structure with D3 of the Cu(I) complex **4**.

Hydrogen atoms, one perchlorate anion and solvent molecules are omitted.

---

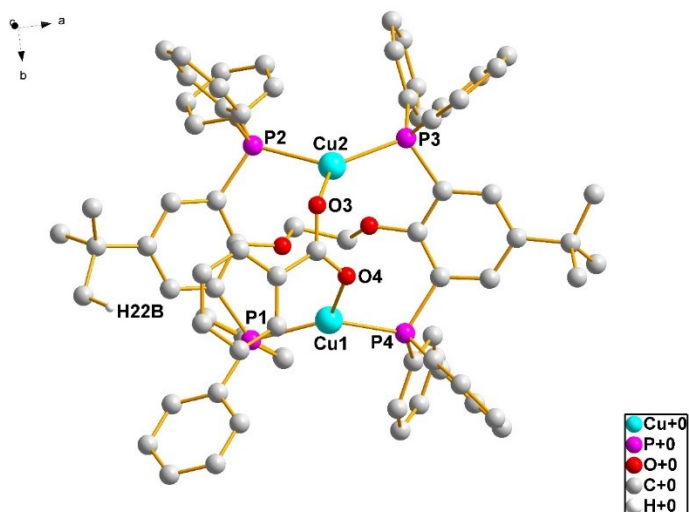

**Fig. S26b.** The optimized ball-and-stick structure with D3 of the Cu(I) complex **5**.

Partial hydrogen atoms, one perchlorate anion and solvent molecules are omitted.

---

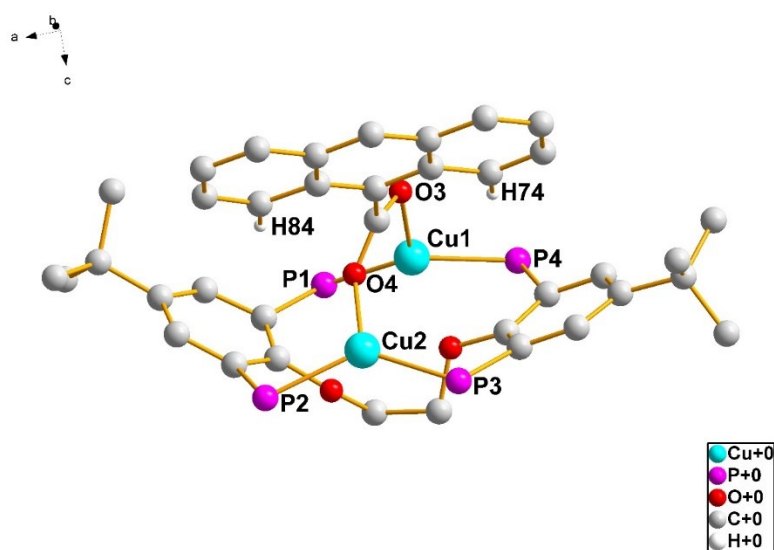

**Fig. S26c.** The optimized ball-and-stick structure with D3 of the Cu(I) complex **6**.

Partial hydrogen atoms, one perchlorate anion, solvent molecules and phenyl are omitted.

7. Comparing diagram of crystal structure (orange) and calculation structure (green) for complex 5.

---

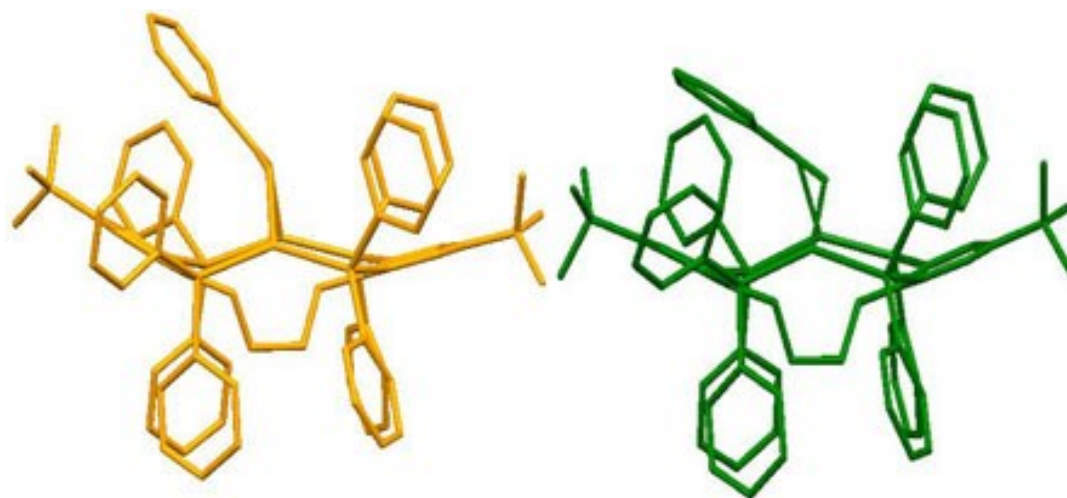

**Fig. S27.** Comparing diagram of crystal structure (orange) and calculation structure (green) for complex 5. The structure is displayed in wire model.

---

## 8. Calculation information table

**Table S3. Details of calculation data collection for complexes 4-6**

| Calculation (with D3) |                |               |                         |                          |                            |
|-----------------------|----------------|---------------|-------------------------|--------------------------|----------------------------|
|                       | Dihedral(exp.) | Dihedral(cal) | Gibbs free Energy(A.U.) | Interaction Energy(A.U.) | Interaction Energy(kJ/mol) |
| <b>host</b>           |                |               | -4614.606944            |                          |                            |
| <b>guest 4</b>        |                |               | -228.5543469            |                          |                            |
| <b>complex 4</b>      | 147.96°        | 142.78°       | -4843.262275            | -0.100983545             | -265.1322974               |
| <b>guest 5</b>        |                |               | -420.2599563            |                          |                            |
| <b>complex 5</b>      | 139.54°        | 140.69°       | -5034.975662            | -0.108761619             | -285.5536307               |
| <b>guest 6</b>        |                |               | -727.4469224            |                          |                            |
| <b>complex 6</b>      | 133.12°        | 130.24°       | -5342.208723            | -0.154856086             | -406.5746538               |
| Calculation (NO D3)   |                |               |                         |                          |                            |
|                       | Dihedral(exp.) | Dihedral(cal) | Gibbs free Energy(A.U.) | Interaction Energy(A.U.) | Interaction Energy(kJ/mol) |
| <b>host</b>           |                |               | -4614.161106            |                          |                            |
| <b>guest 4</b>        |                |               | -228.5543736            |                          |                            |
| <b>complex 4</b>      | 147.96°        | 147.84°       | -4842.778184            | -0.06270469              | -164.6311636               |
| <b>guest 5</b>        |                |               | -420.2600786            |                          |                            |
| <b>complex 5</b>      | 139.54°        | 148.97°       | -5034.470925            | -0.049740727             | -130.5942787               |
| <b>guest 6</b>        |                |               | -727.44722              |                          |                            |
| <b>complex 6</b>      | 133.12°        | 146.88°       | -5341.65549             | -0.047164471             | -123.8303186               |
